# Supplementary material for: TiO2 Nanowire Networks Prepared by Titanium Corrosion and Their Application to Bendable Dye-Sensitized Solar Cells
Source: MDPI journal article supplement (doi:10.3390/nano7100315), 2017-10-12
Supplement: s1 [file s1]

# TiO<sub>2</sub> Nanowire Networks Prepared by Titanium Corrosion and Their Application to Bendable Dye-Sensitized Solar Cells

Saera Jin †, Eunhye Shin † and Jongin Hong \*

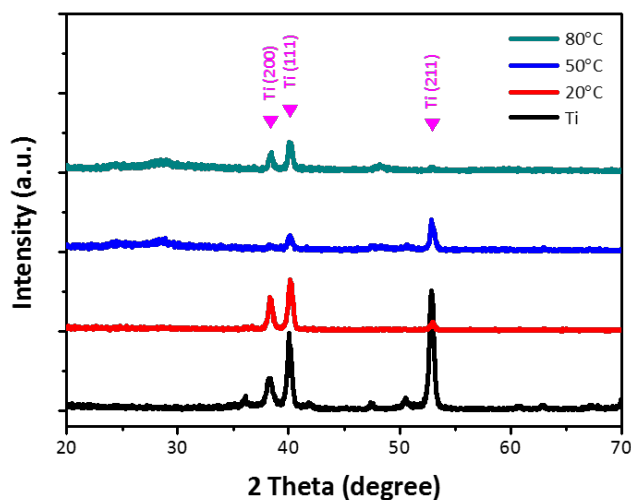

**Figure S1.** XRD patterns of the wet-corroded Ti foil samples at various temperatures in 5 M KOH aqueous solution and normal Ti foil.

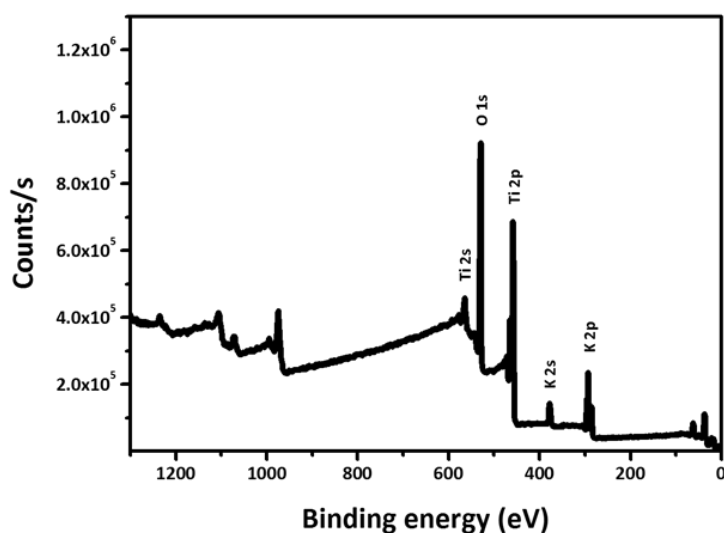

**Figure S2.** Survey XPS spectrum of wet-corroded Ti foil sample at corrosion temperature of 50°C and corrosion time of 48h.
